# Supplementary material for: A series of novel rare-earth bismuth tungstate compounds LnBiW2O9 (Ln = Ce, Sm, Eu, Er): Synthesis, crystal structure, optical and electronic properties
Source: Royal Society of Chemistry journal article supplement (doi:10.1039/c1dt10460h), 2011-01-01
Supplement: c1dt10460h.pdf [file c1dt10460h.pdf]

**A series of novel rare-earth bismuth tungstate compounds LnBiW<sub>2</sub>O<sub>9</sub> (Ln = Ce, Sm, Eu, Er):  
Synthesis, crystal structure, optical and electronic properties**

**Ye-Yu Li,<sup>a,b</sup> Wen-Dan Cheng,<sup>\*a</sup> Hao Zhang,<sup>a</sup> Chen-Sheng Lin,<sup>a</sup> Wei-Long Zhang,<sup>a</sup> Lei Geng,<sup>a,b</sup>  
Guo-Liang Chai,<sup>a,b</sup> Zhong-Zhen Luo,<sup>a,b</sup> and Zhang-Zhen He<sup>a</sup>**

**Supporting information**

Figure S1. The coordinate environment of Bi(1) and Ce(1) ions in CeBiW<sub>2</sub>O<sub>9</sub>.

Figure S2. The elemental analysis for **1-4** (a-d).

Figure S3. Simulated and experimental X-ray powder diffraction patterns for **1-4** (a-d).

Figure S4. UV absorption spectra for **1-4** (a-d).

Figure S5. Optical diffuse reflectance spectra for **1-4** (a-d).

Figure S6. The infrared spectra for **1-4** (a-d).

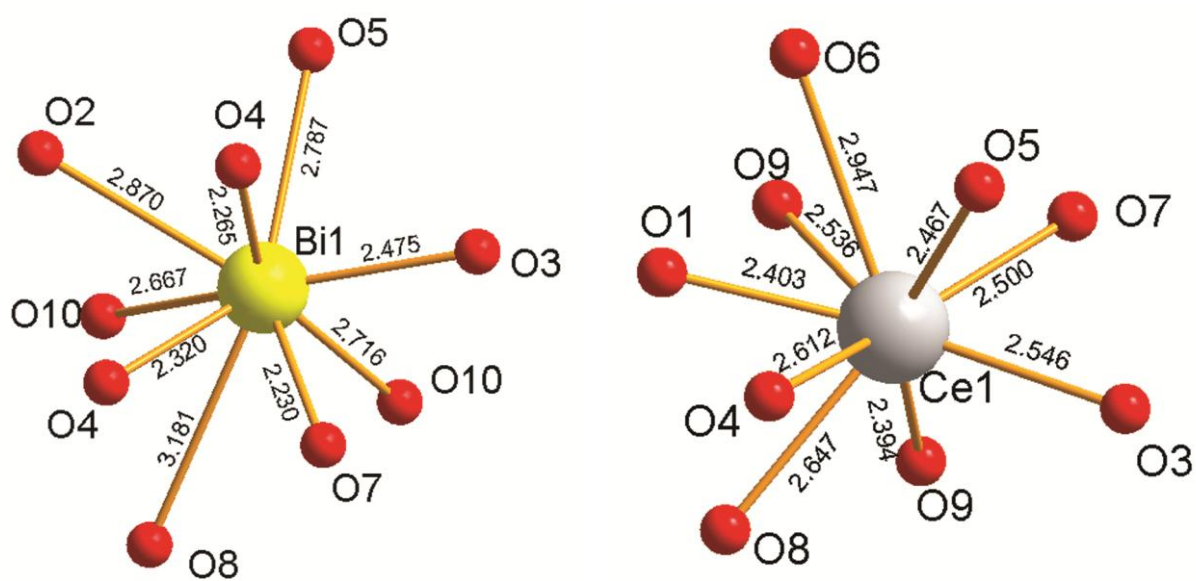

Figure S1. The coordinate environment of Bi(1) and Ce(1) ions in CeBiW<sub>2</sub>O<sub>9</sub>

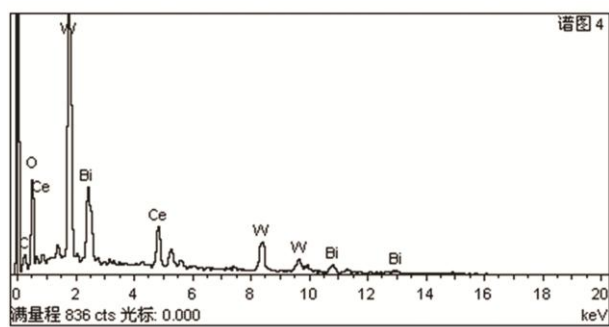

(a)

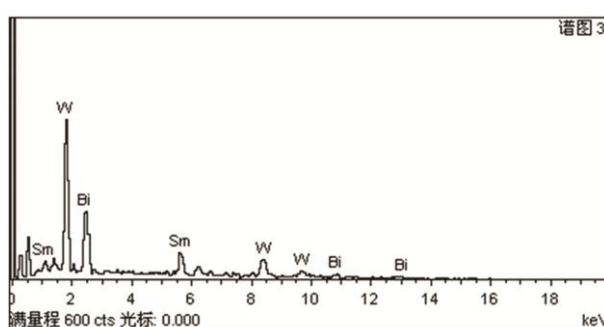

(b)

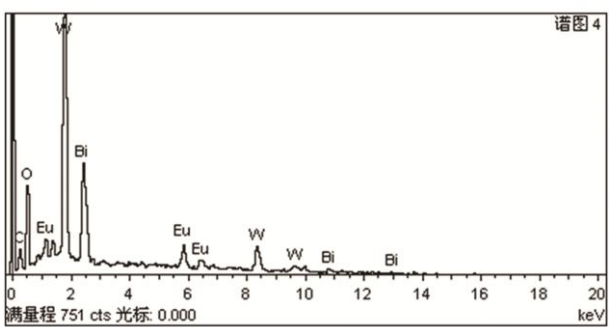

(c)

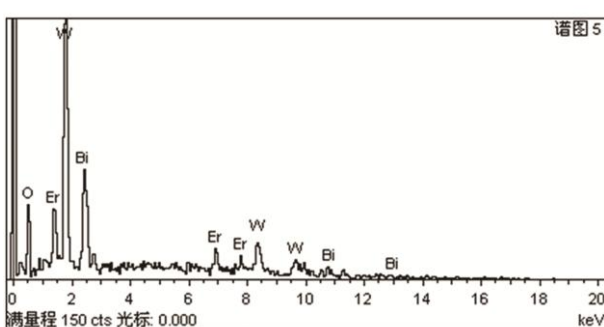

(d)

Figure S2. The elemental analysis for **1-4** (a-d)

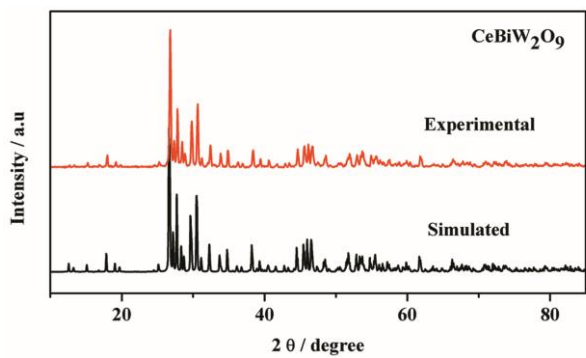

(a)

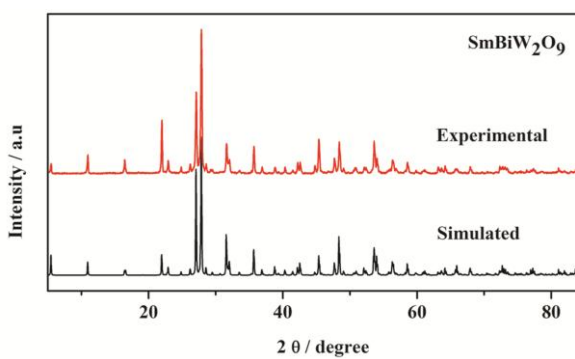

(b)

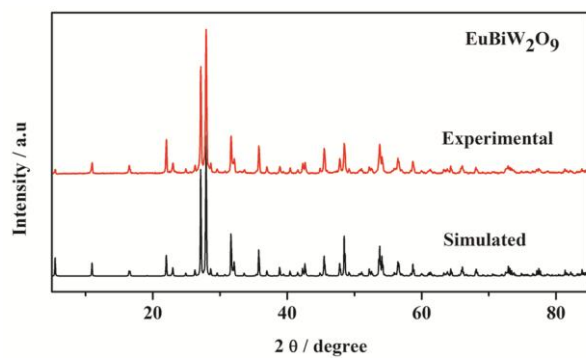

(c)

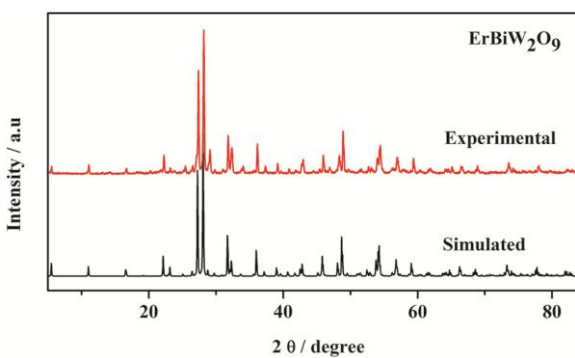

(d)

Figure S3. Simulated and experimental X-ray powder diffraction patterns for **1-4** (a-d)

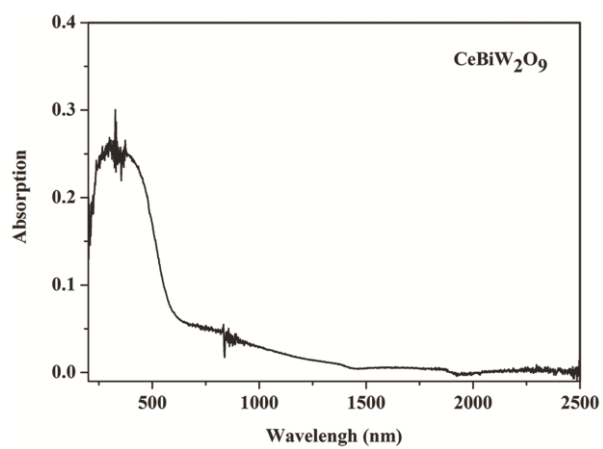

(a)

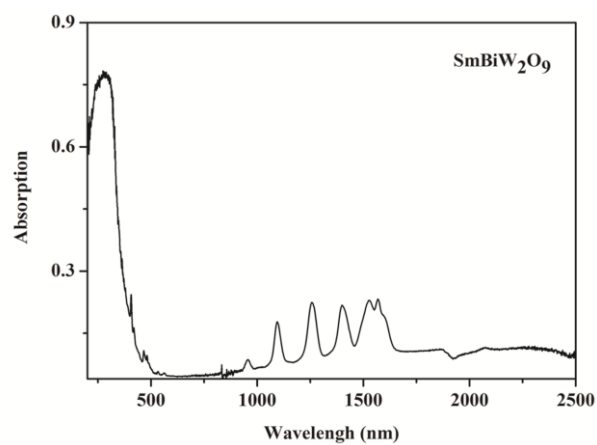

(b)

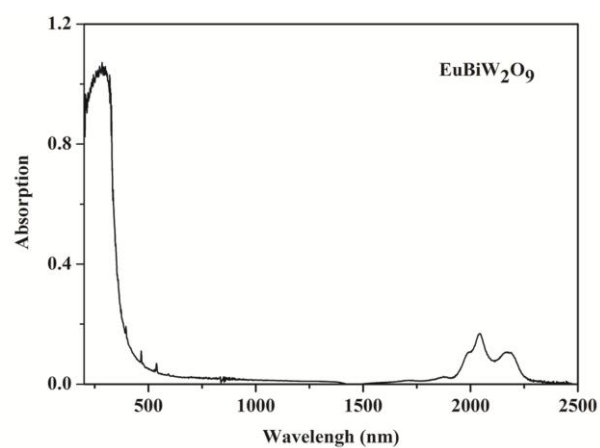

(c)

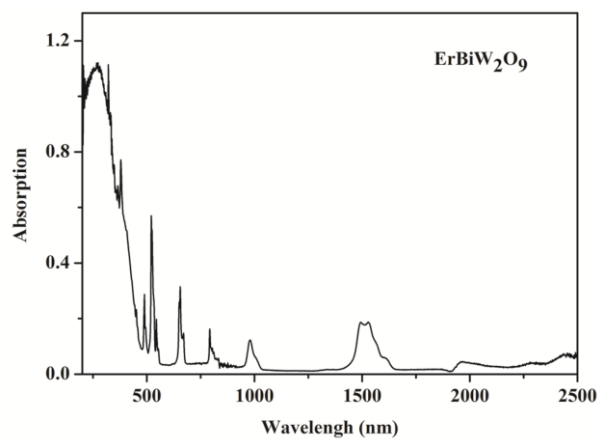

(d)

Figure S4. UV absorption spectra for **1-4** (a-d)

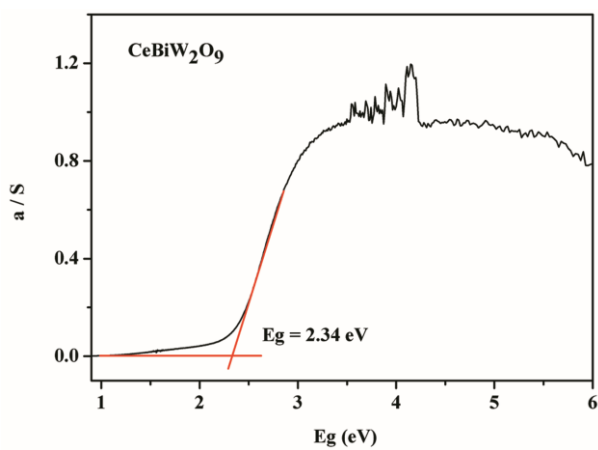

(a)

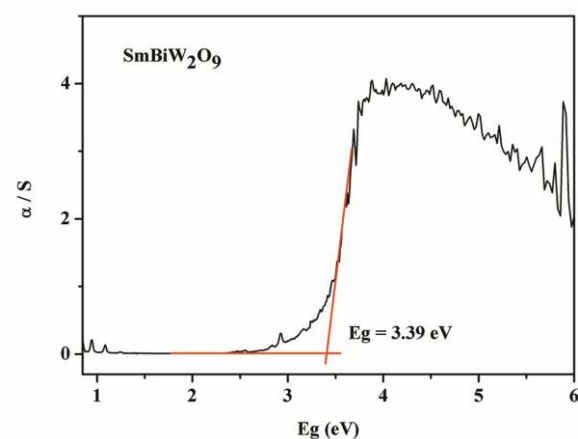

(b)

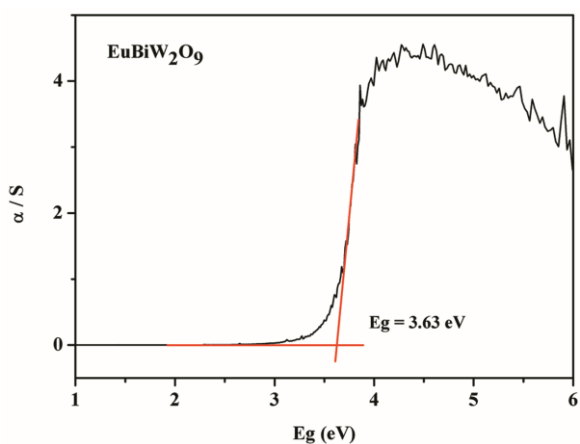

(c)

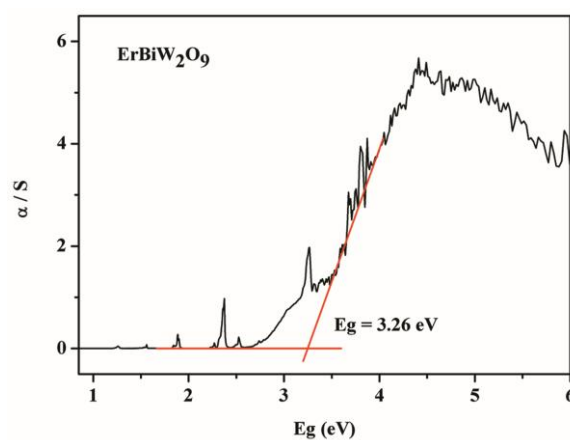

(d)

Figure S5. Optical diffuse reflectance spectra for **1-4** (a-d)

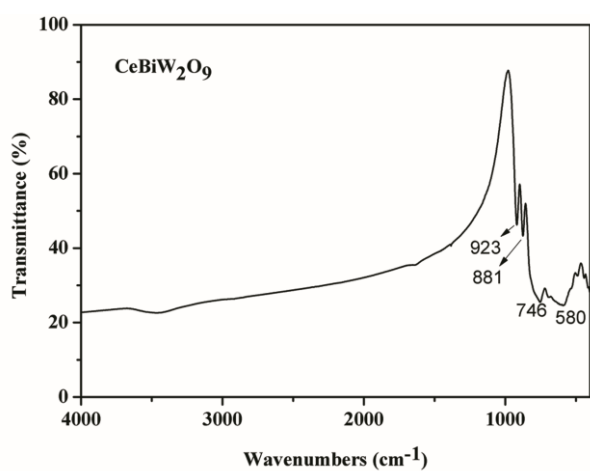

(a)

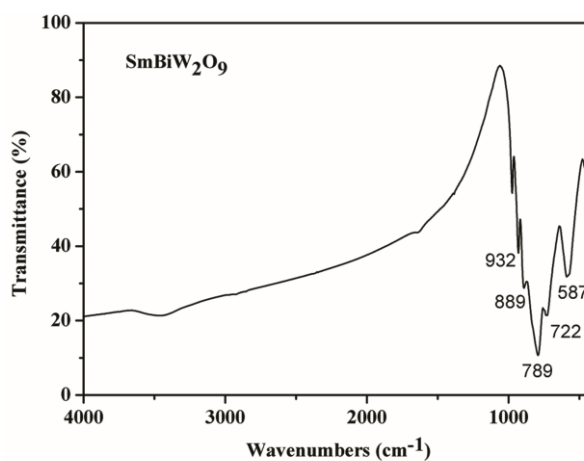

(b)

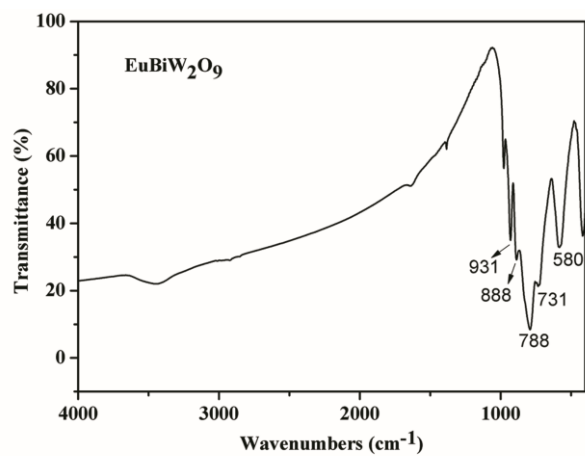

(c)

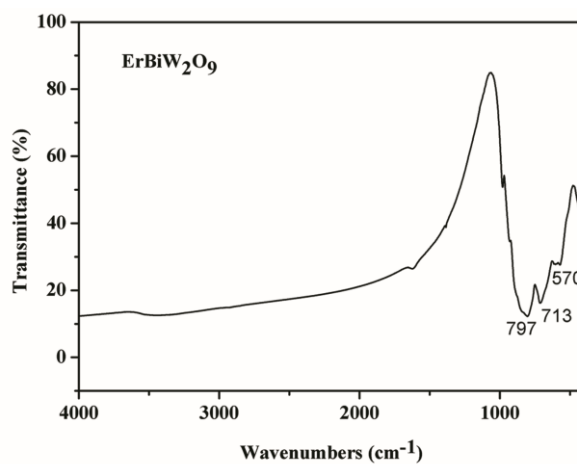

(d)

Figure S6. The infrared spectra for **1-4** (a-d)
